# Supplementary material for: Impact of substituent effects on the design of β-sheet mimetics and β-double helices from (E)-vinylogous γ-amino acid oligomers
Source: Royal Society of Chemistry journal article supplement (doi:10.1039/c9ob01801h), 2019-01-01

# Impact of Substituent Effects in the Design of $\beta$ -Sheet Mimetic and $\beta$ -Double Helix from (E)-Vinylogous $\gamma$ -Amino Acid Oligomers

Kuruva Veeresh, Manjeet Singh and Hosahudya N. Gopi\*

*Department of Chemistry, Indian Institute of Science Education and Research, Dr. Homi Bhabha Road, Pune-411008, India E-mail: [hn.gopi@iiserpune.ac.in](mailto:hn.gopi@iiserpune.ac.in)*

## Table of Contents

| S.No | Content                                                            | Page No |
|------|--------------------------------------------------------------------|---------|
| 1    | ORTEP diagrams of peptides                                         | 2       |
| 2    | Crystallographic information of peptides                           | 3       |
| 3    | Torsion angles and H-bond parameters of peptides                   | 4       |
| 4    | C-H...O H-bonding in Parameters of peptide <b>P1</b> and <b>P2</b> | 5       |
| 5    | $^1\text{H}$ , $^{13}\text{C}$ NMR and mass spectra of compounds   | 6       |

## 1. ORTEP diagrams of peptides

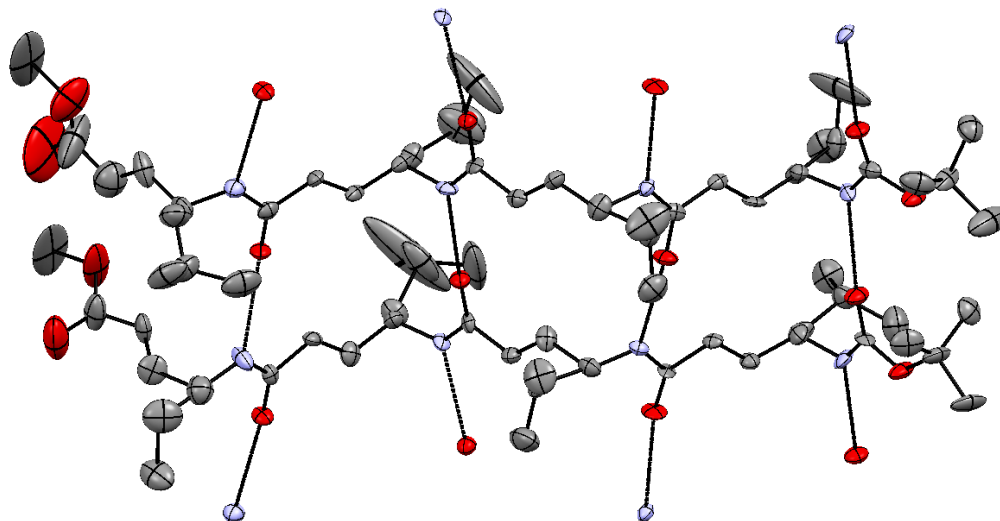

**Figure S1:** ORTEP diagram of **P1** (BocNH-((*S,E*)d<sup>2,3</sup> $\gamma$ Lue)<sub>4</sub>-OMe) Ellipsoids are drawn to 50% probability and hydrogen atoms are not shown for clarity. (CCDC 1907413)

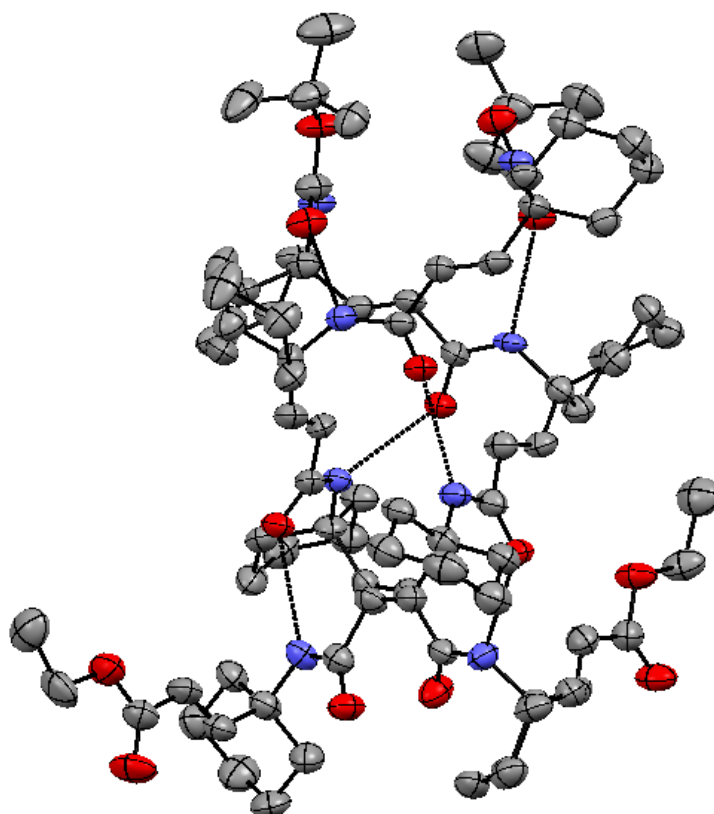

**Figure S2:** ORTEP diagram of **P2** (BocNH-((*E*)d<sup>2,3</sup> $\gamma$ Ac<sub>6</sub>c)<sub>4</sub>-OEt) Ellipsoids are drawn to 50% probability and hydrogen atoms are not shown for clarity. (CCDC 1912116)

## 2. Crystallographic Information of Peptides

The X-ray data of **P1** and **P2** was collected at 100 K on diffractometer using Mo K $\alpha$  radiation ( $\lambda = 0.71073 \text{ \AA}$ ). The structures were obtained by direct methods using the SHELXS-97 program.

|                                   | <b>P1</b>                                                     | <b>P2<sup>(a)</sup></b>                                       |
|-----------------------------------|---------------------------------------------------------------|---------------------------------------------------------------|
| Chemical formula                  | C <sub>38</sub> H <sub>64</sub> N <sub>4</sub> O <sub>7</sub> | C <sub>43</sub> H <sub>66</sub> N <sub>4</sub> O <sub>7</sub> |
| Molecular weight                  | 688.9510                                                      | 751.022                                                       |
| Crystal habit                     | Clear                                                         | Clear                                                         |
| Crystal size (nm)                 | 0.2 × 0.2 × 0.3                                               | 0.3 × 0.3 × 0.4                                               |
| Crystallization solvent           | ethyl acetate/n-hexane                                        | ethyl acetate/n-hexane                                        |
| Space group                       | P 1                                                           | P -1                                                          |
| a (Å)                             | 10.0311(19)                                                   | 15.8190(9)                                                    |
| b (Å)                             | 13.762(3)                                                     | 15.8231(10)                                                   |
| c (Å)                             | 14.965(3)                                                     | 21.9625(13)                                                   |
| $\alpha$ (d $g$ e)                | 92.146(5)                                                     | 71.776(4)                                                     |
| $\beta$ (d $g$ e)                 | 95.340(5)                                                     | 84.613(4)                                                     |
| $\gamma$ (d $g$ e)                | 97.624(5)                                                     | 63.813(4)                                                     |
| Volume (Å) <sup>3</sup>           | 2036.1(7)                                                     | 4679.4(5)                                                     |
| Z                                 | 2                                                             | 2                                                             |
| Molecules/asym.unit               | 2                                                             | 2                                                             |
| Density (g/cm <sup>3</sup> )(cal) | 1.124                                                         | 1.163                                                         |
| F (000)                           | 1752.33                                                       | 751.0                                                         |
| Radiation                         | Mo K $\alpha$                                                 | Mo K $\alpha$                                                 |
| 2 $\theta$ Max. (°)               | 56.924                                                        | 155.702                                                       |
| $\mu$ mm <sup>-1</sup>            | 0.077                                                         | 0.656                                                         |
| Reflections (cal)                 | 20574                                                         | 19967                                                         |
| Parameters                        | 907                                                           | 1065                                                          |
| R (reflections)                   | 0.1362( 6570)                                                 | 0.1122( 7584)                                                 |
| wR2 (Reflections)                 | 0.3810( 20311)                                                | 0.3551( 19967)                                                |
| Goodness-of- fit (S)              | 0.977                                                         | 1.031                                                         |

<sup>(a)</sup>Option SQUEEZE of PLATON program was used to remove disordered solvent molecules. SQUEEZE Output CIF was submitted to CCDC.

### 3. Torsion angles and H-bond parameters of peptides

**Table1.** Torsion angles of peptide **P1** and **P2**.

| Residue                                                                                 | $\phi^\circ$ | $\theta_1^\circ$ | $\theta_2^\circ$ | $\psi^\circ$ |
|-----------------------------------------------------------------------------------------|--------------|------------------|------------------|--------------|
| <b>BocNH-((S,E)d<sup>2,3</sup><math>\gamma</math>Lue)<sub>4</sub>-OMe (P1)</b>          |              |                  |                  |              |
| <b><math>\beta</math>-Sheet strand a</b>                                                |              |                  |                  |              |
| (S,E)d <sup>2,3</sup> $\gamma$ Lue (1)                                                  | -96.59       | 114.97           | -179.56          | 171.94       |
| (S,E)d <sup>2,3</sup> $\gamma$ Lue (2)                                                  | -109.15      | 116.15           | -178.54          | 168.54       |
| (S,E)d <sup>2,3</sup> $\gamma$ Lue (3)                                                  | -118.06      | 111.60           | 179.14           | 176.31       |
| (S,E)d <sup>2,3</sup> $\gamma$ Lue (3)                                                  | -112.40      | 116.90           | -179.64          | -10.97       |
| <b><math>\beta</math>-Sheet strand b</b>                                                |              |                  |                  |              |
| (S,E)d <sup>2,3</sup> $\gamma$ Lue (1)                                                  | -100.88      | 112.67           | -177.95          | 169.06       |
| (S,E)d <sup>2,3</sup> $\gamma$ Lue (2)                                                  | -104.01      | 111.86           | 177.63           | 172.30       |
| (S,E)d <sup>2,3</sup> $\gamma$ Lue (3)                                                  | -108.51      | 114.93           | 179.27           | 166.99       |
| (S,E)d <sup>2,3</sup> $\gamma$ Lue (3)                                                  | 137.20       | -15.24           | 176.76           | 178.77       |
| <b>BocNH-((E)d<sup>2,3</sup><math>\gamma</math>Ac<sub>6</sub>C)<sub>4</sub>-OEt(P2)</b> |              |                  |                  |              |
| <b><math>\beta</math>-double helical Strand a</b>                                       |              |                  |                  |              |
| E-d <sup>2,3</sup> $\gamma$ Ac <sub>6</sub> C (1)                                       | 65.50        | 17.72            | 169.10           | -167.56      |
| E-d <sup>2,3</sup> $\gamma$ Ac <sub>6</sub> C (2)                                       | 79.61        | 15.46            | 173.89           | -170.96      |
| E-d <sup>2,3</sup> $\gamma$ Ac <sub>6</sub> C (3)                                       | 66.11        | 14.26            | 173.05           | -173.77      |
| E-d <sup>2,3</sup> $\gamma$ Ac <sub>6</sub> C (4)                                       | -62.58       | -17.43           | 177.65           | 175.34       |
| <b><math>\beta</math>-double helical Strand b</b>                                       |              |                  |                  |              |
| E-d <sup>2,3</sup> $\gamma$ Ac <sub>6</sub> C (1)                                       | 72.41        | 5.81             | 173.97           | -167.10      |
| E-d <sup>2,3</sup> $\gamma$ Ac <sub>6</sub> C (2)                                       | 65.25        | 27.69            | 172.38           | -172.65      |
| E-d <sup>2,3</sup> $\gamma$ Ac <sub>6</sub> C (3)                                       | 68.42        | 21.02            | 172.86           | -174.16      |
| E-d <sup>2,3</sup> $\gamma$ Ac <sub>6</sub> C (4)                                       | -65.76       | -15.31           | -176.50          | 168.39       |

**Table 2:** Hydrogen Bond Parameters of **P1**

| Donor (D) | Acceptor (A) | DH...A (Å) | D...A (Å) | NH...O (deg) |
|-----------|--------------|------------|-----------|--------------|
| N1        | O9           | 2.073      | 2.854     | 150.68       |
| N3        | O11          | 2.086      | 2.882     | 153.77       |
| N6        | O3           | 2.040      | 2.881     | 165.33       |
| N8        | O5           | 2.15       | 2.996     | 167.37       |

**Table 3:** Hydrogen Bond Parameters of **P2**

| Donor (D) | Acceptor (A) | DH...A (Å) | D...A (Å) | NH...O (deg) |
|-----------|--------------|------------|-----------|--------------|
| N2        | O9           | 2.041      | 2.879     | 172.21       |
| N3        | O10          | 2.13       | 2.819     | 155.59       |
| N4        | O11          | 2.11       | 2.857     | 145.60       |
| N6        | O2           | 2.073      | 2.930     | 175.03       |
| N7        | O3           | 2.059      | 2.883     | 160.22       |
| N8        | O4           | 2.130      | 2.995     | 160.80       |

#### 4. C-H...O H-bonding in Parameters of peptide P1 and P2

**Table 4:** C-H...O H-bond parameters **P1**

| Donor (D) | Acceptor (A) | DH...A (Å) | D...A (Å) | CH...O (deg) |
|-----------|--------------|------------|-----------|--------------|
| C66       | O5           | 2.825      | 3.561     | 136.88       |
| C23       | O11          | 2.783      | 3.482     | 129.61       |
| C53       | O3           | 2.740      | 3.489     | 134.47       |

**Table 5:** C-H...O H-bond parameters **P2**

| Donor (D) | Acceptor (A) | DH...A (Å) | D...A (Å) | NH...O (deg) |
|-----------|--------------|------------|-----------|--------------|
| C19       | O9           | 2.257      | 3.357     | 143.59       |
| C59       | O6           | 2.702      | 3.392     | 128.56       |
| C71       | O5           | 2.684      | 3.372     | 128.29       |
| C22       | O10          | 2.678      | 3.404     | 135.50       |
| C31       | O11          | 2.642      | 3.371     | 135.22       |
| C80       | O4           | 2.662      | 3.384     | 131.52       |

## 5. $^1\text{H}$ , $^{13}\text{C}$ and mass spectra of compounds

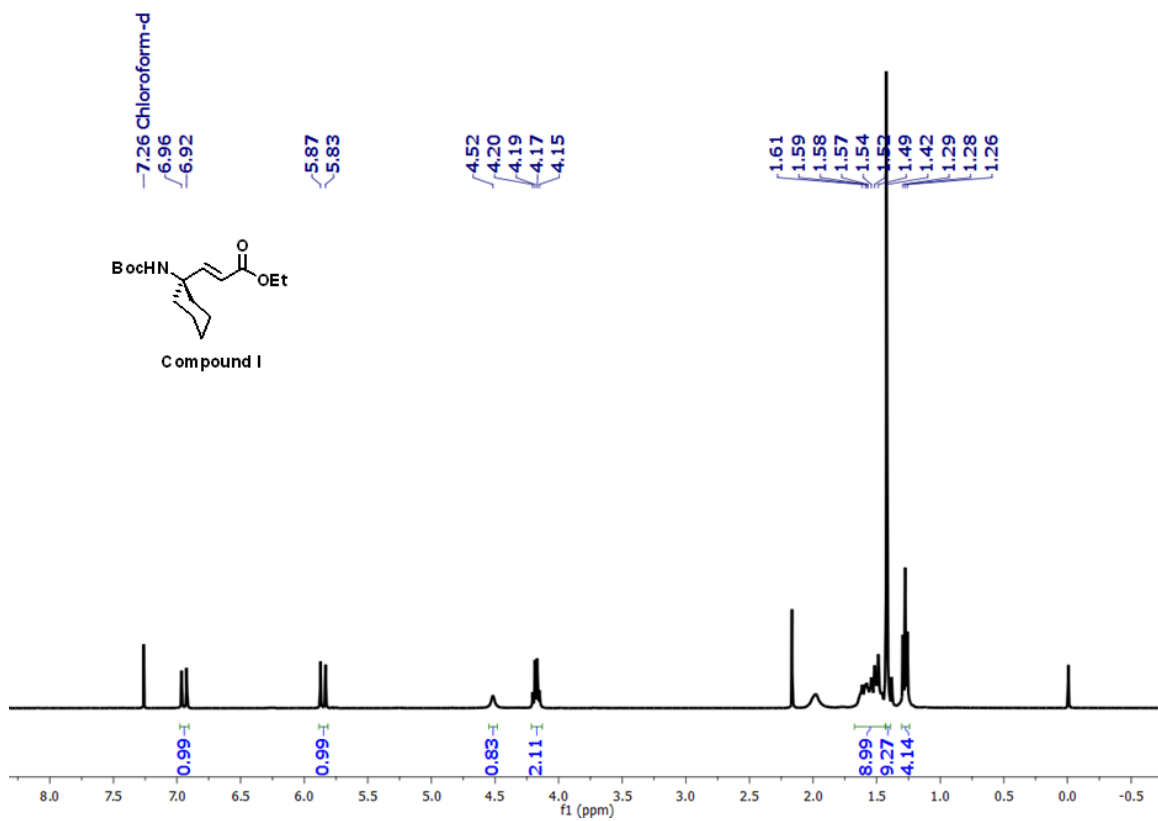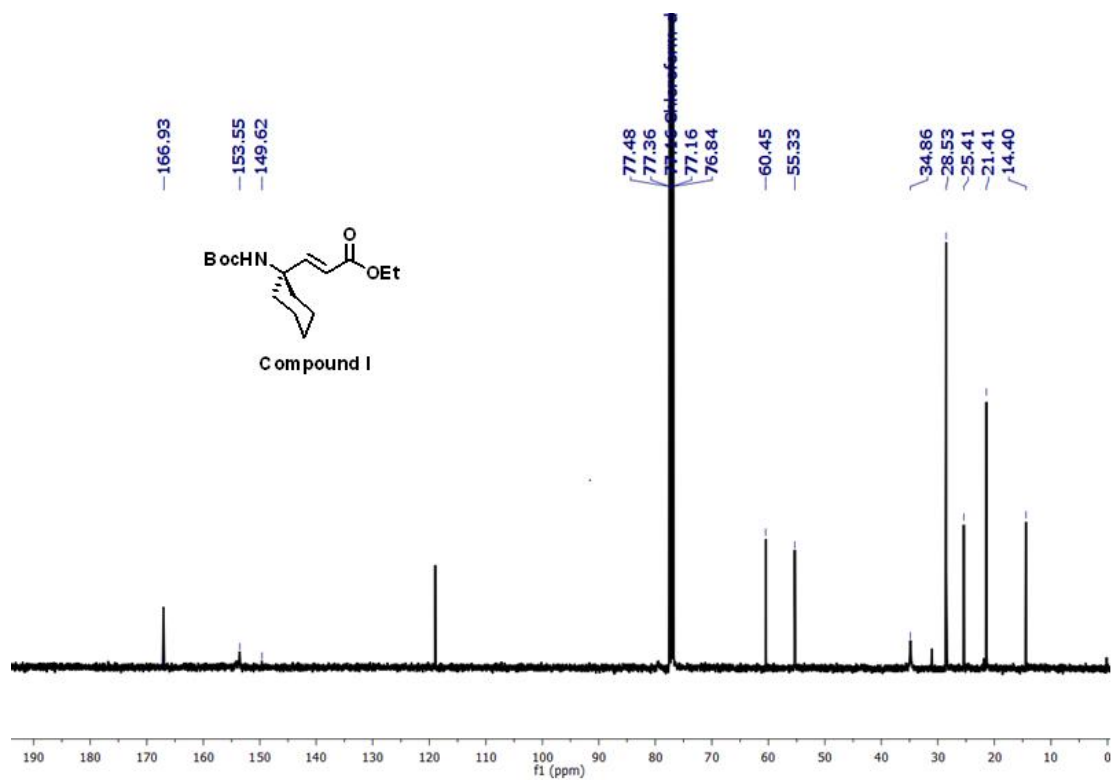

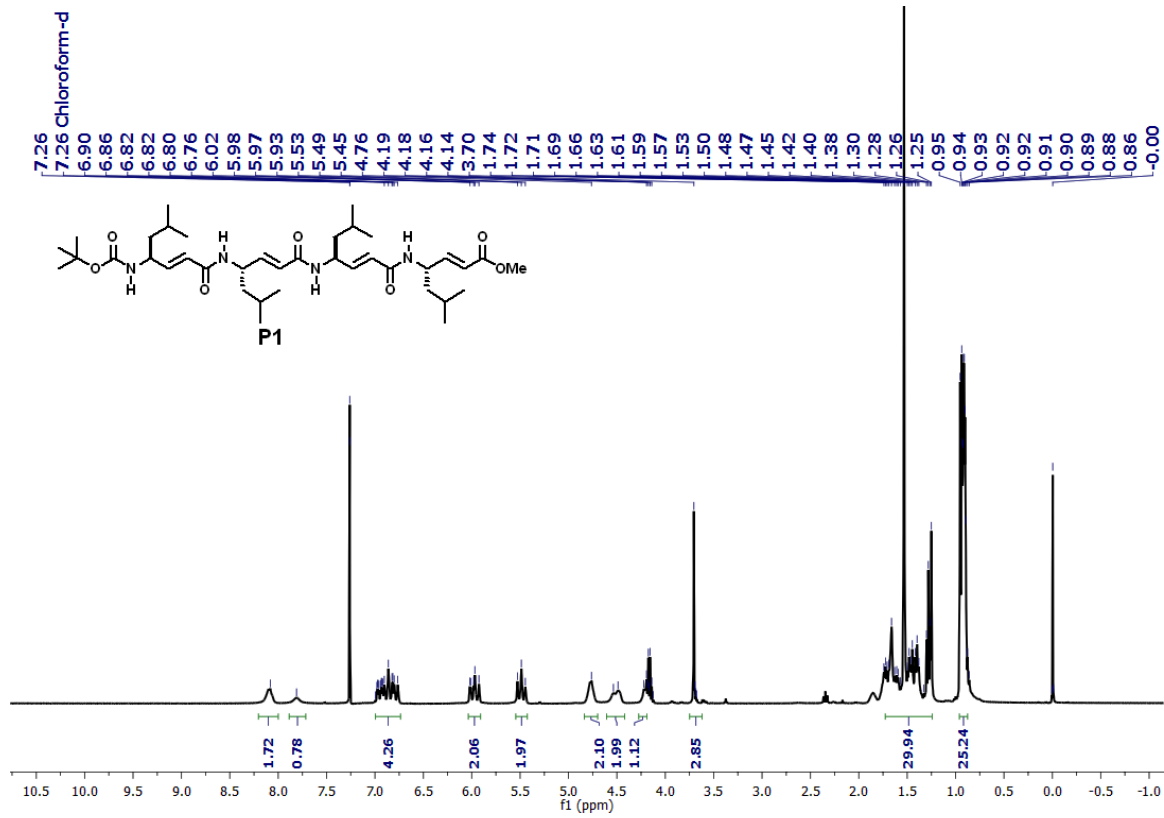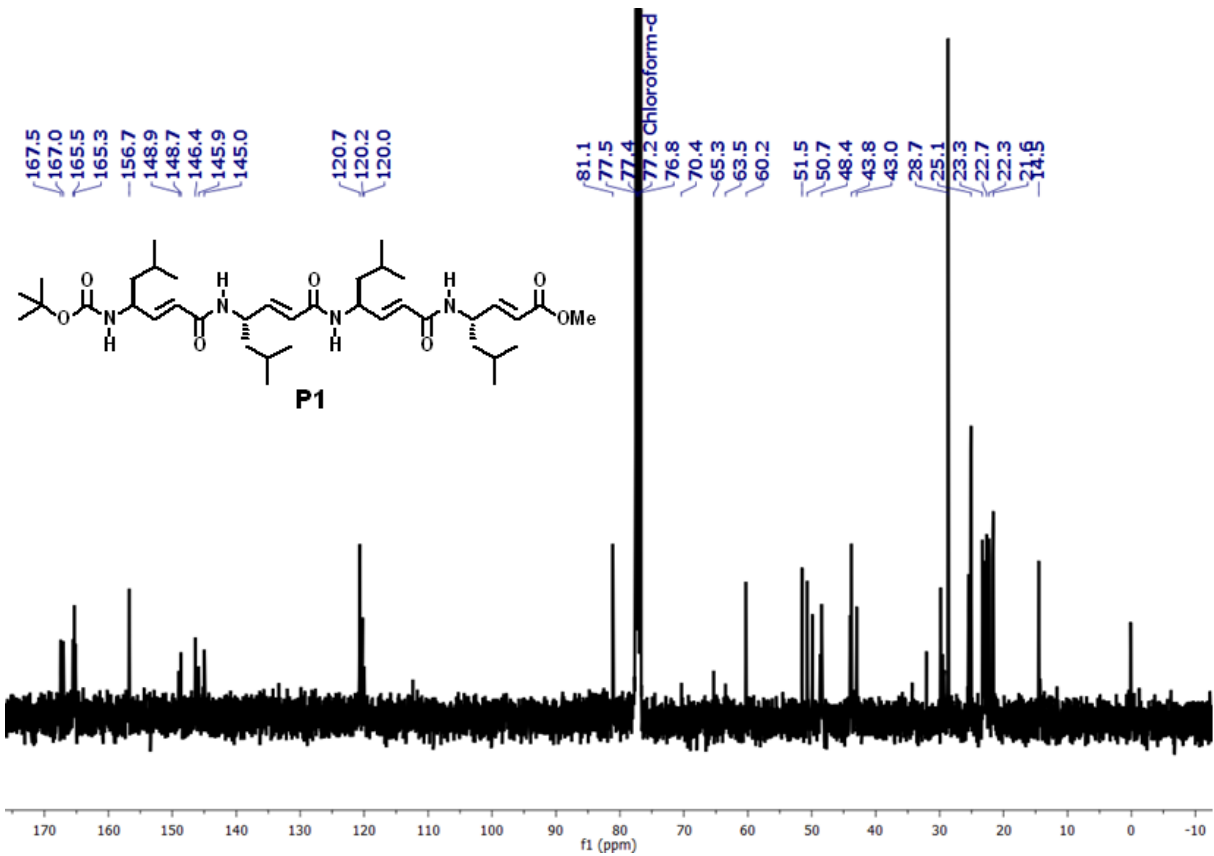

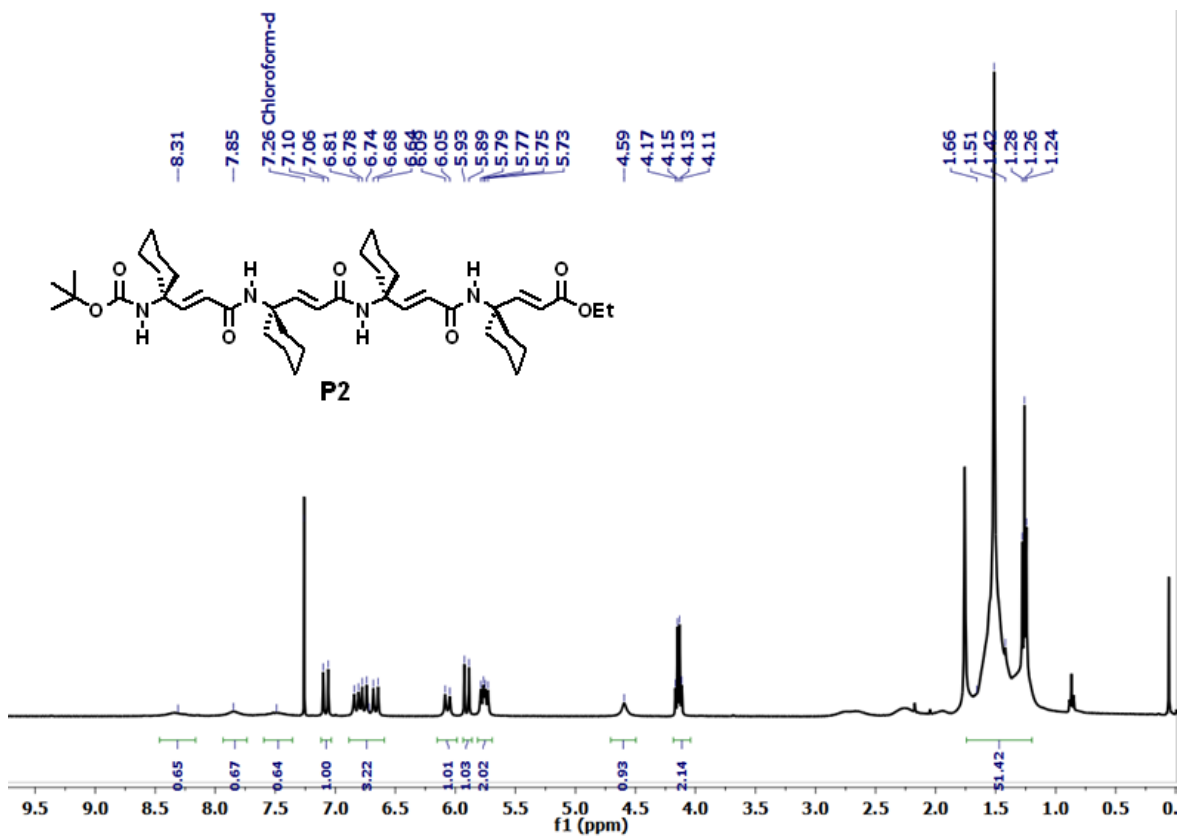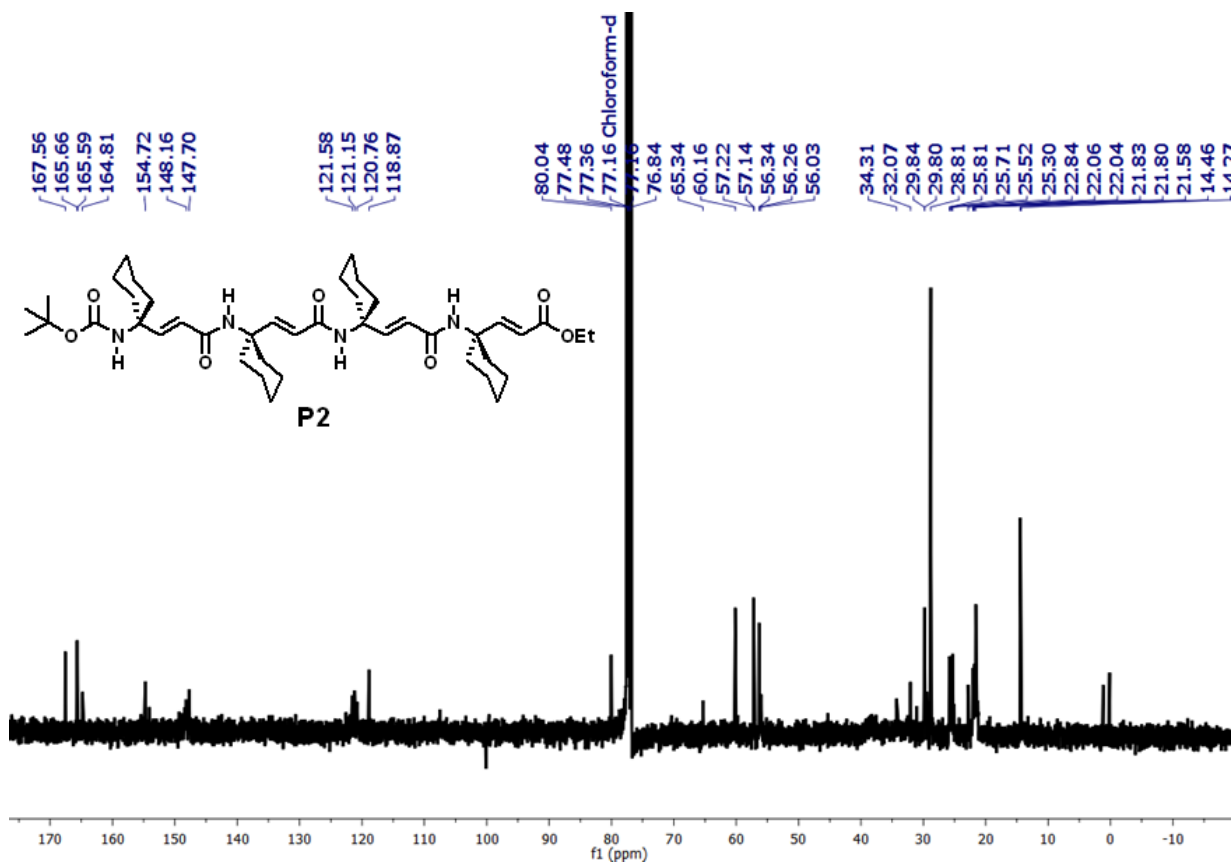



# Spectrum Report

Final - Shots 500 - IISER-96-2-2018; Run #333; Label C1

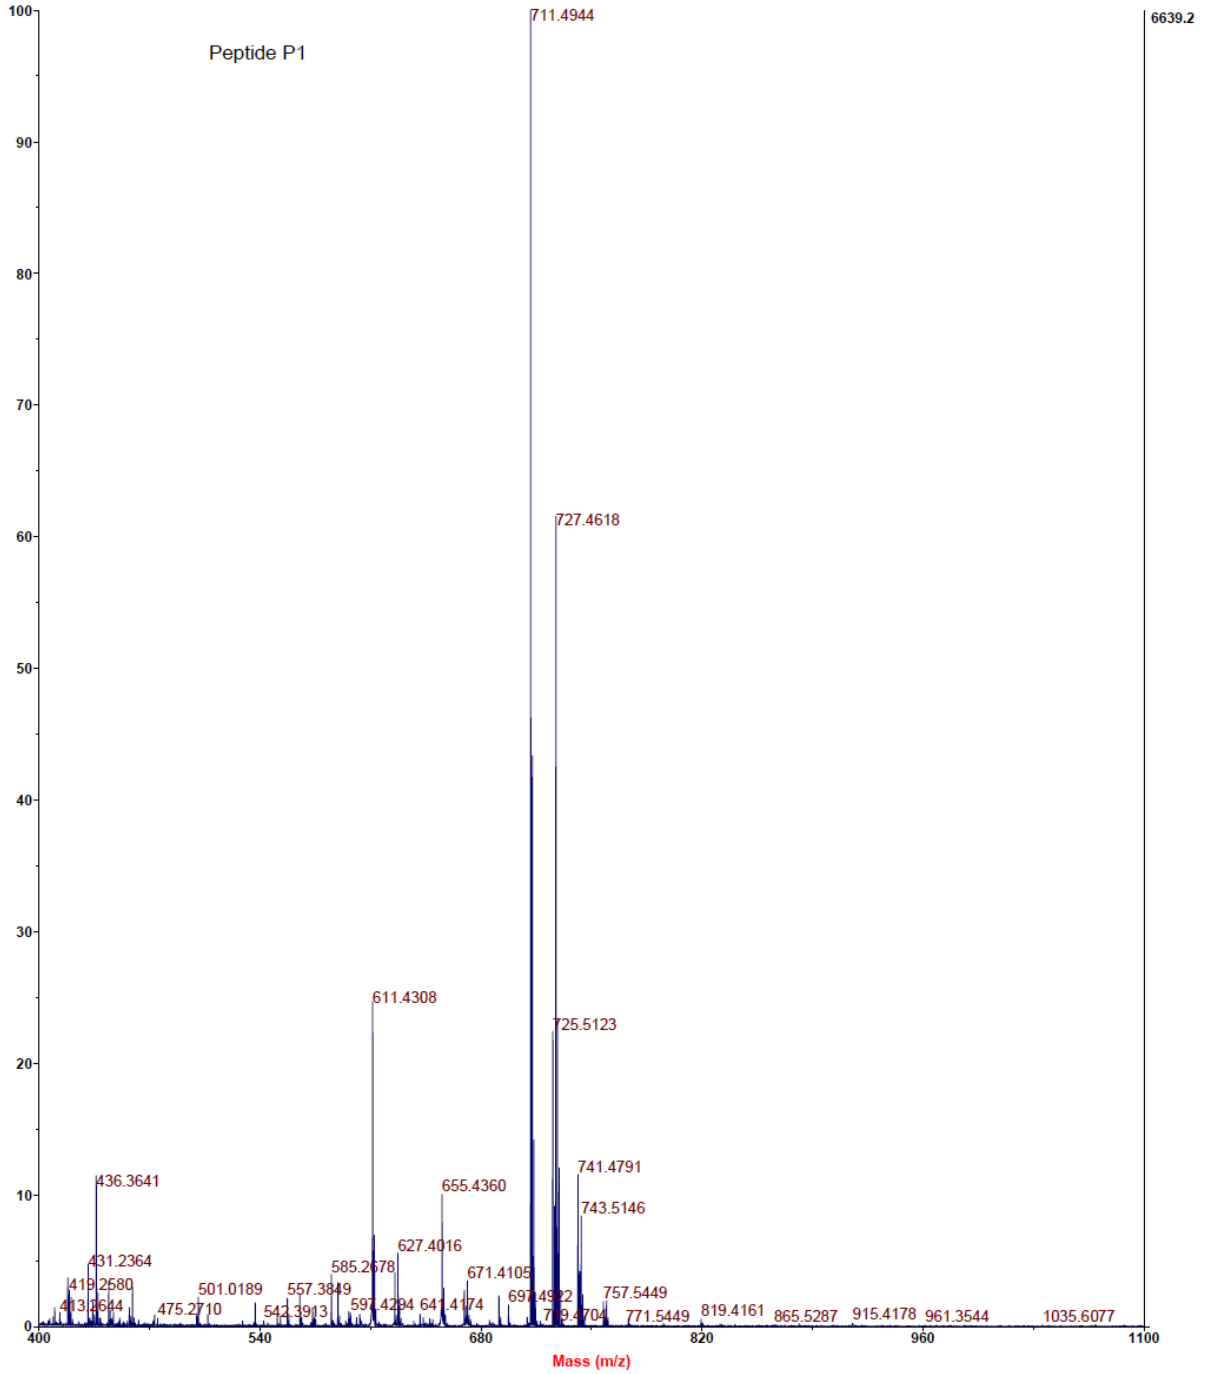

# Spectrum Report

Final - Shots 400 - IISER-96-2-2019; Label B6

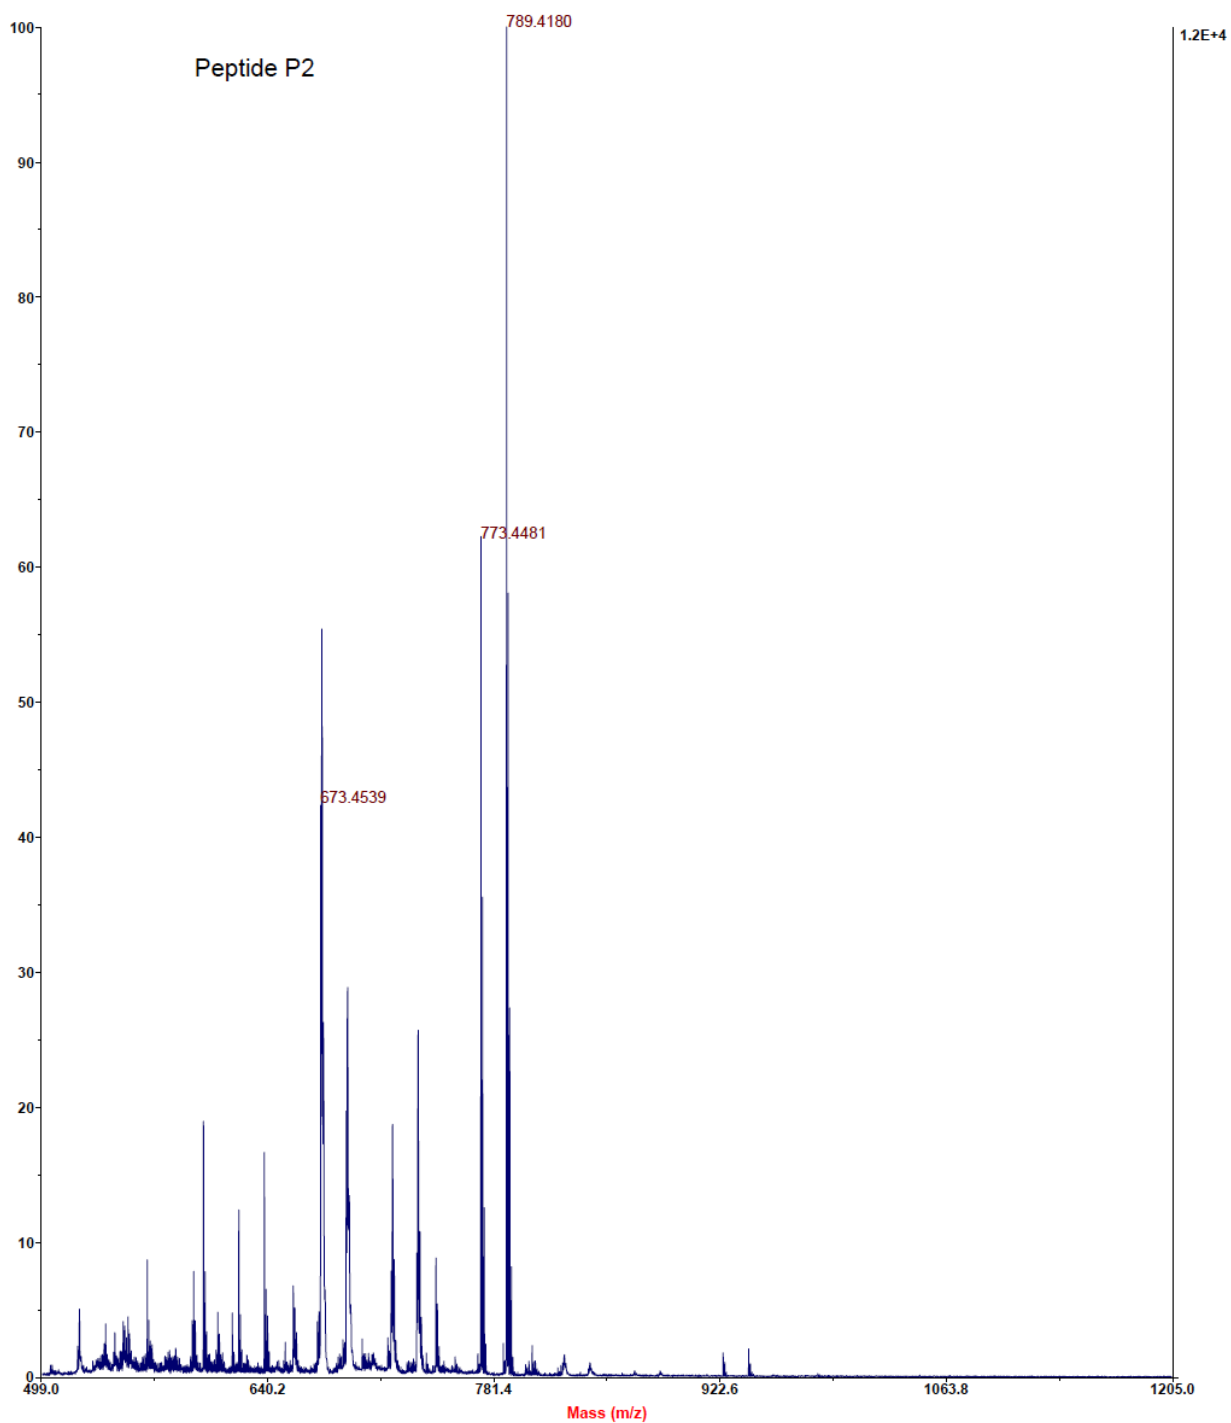

Supplement: c9ob01801h1.pdf [file c9ob01801h1.pdf]
